# Supplementary material for: Searching for Information on the Risks of Combined Hormonal Contraceptives on the Internet: A Qualitative Study Across Six European Countries
Source: PubMed Central journal article supplement (PMC6441861; doi:10.2196/10810), 2019-03-18
Supplement: jmir_v21i3e10810_app1.pdf [file jmir_v21i3e10810_app1.pdf]

## Appendix 1

Data extraction form and brief explanation of its content

| Variable             | Sub-Variable                                | Definition                                                                           |
|----------------------|---------------------------------------------|--------------------------------------------------------------------------------------|
| Name of host website | -                                           | Title/designation of the website                                                     |
| Website address      | -                                           | Hyperlink to the website                                                             |
| Target population    | General population                          | All population, without specifying a particular group                                |
|                      | Health professionals                        | Only health professionals including doctors, nurses or any health-related profession |
|                      | Under 25s/youth/students                    | Youth population, including adolescents and students                                 |
|                      | Women                                       | Only women                                                                           |
|                      | Women/health professionals                  | Both women and health professionals                                                  |
| Type of website      | Beauty/fitness/lifestyle website            | Online magazines or blogs focusing on women beauty, fitness and lifestyle            |
|                      | Charity                                     | Websites run by/representing charity organisations                                   |
|                      | Health blog/network                         | Blog containing health advice and/or information                                     |
|                      | Insurance services                          | Websites advertising/representing insurance companies                                |
|                      | Legal services                              | Law/legal advice and consultations                                                   |
|                      | Media                                       | Newspapers, magazines and TV channels                                                |
|                      | NGO medical services                        | Non-governmental medical groups and/or services providing clinical support           |
|                      | National health service                     | Governmental departments about healthcare                                            |
|                      | Personal blog                               | Individual blogs expressing personal/independent views                               |
|                      | Petition website                            | Websites advertising for online petitions                                            |
|                      | Religious blog                              | Websites run by/representing religious groups                                        |
|                      | Science blog                                | Websites reporting and/or discussing scientific news                                 |
| Support group        | Websites run by/representing support groups |                                                                                      |

|                                           |             |                                                                                       |
|-------------------------------------------|-------------|---------------------------------------------------------------------------------------|
|                                           | Travel blog | Blogs providing health advice and information for travellers                          |
| Brief description of information provided | -           | Summary of the contents covered by the website (e.g. headings, main message, etc.)    |
| Last updated to website                   | -           | Year                                                                                  |
| References/data sources                   | -           | Cited sources, such as guidelines, papers or national and international organisations |
| Existence of forums/discussion groups     | -           | Websites containing message boards, discussion groups or links to social networks     |
